# Supplementary material for: Regulation of mechanical properties and self-healing performance of polyurethane nanocomposites by tuning the contents of free and associated hydrogen bonds
Source: Royal Society of Chemistry journal article supplement (doi:10.1039/d3py01098h), 2023-12-21
Supplement: d3py01098h1.pdf [file d3py01098h1.pdf]

## Electronic Supplementary Information

### Regulation of mechanical properties and self-healing performance of polyurethane nanocomposites by tuning the contents of free and associated hydrogen bonds

Aofei Zhang,<sup>‡a</sup> Qiaona Huang,<sup>‡a</sup> Xiaoyu Du,<sup>a</sup> Yinmao Wang,<sup>b</sup> Juan Yang,<sup>a</sup> Sumin Li,<sup>a</sup>  
Maiyong Zhu,<sup>\*a</sup> Yijing Nie<sup>\*a</sup>

<sup>a</sup> *Research School of Polymeric Materials, School of Materials Science and  
Engineering, Jiangsu University, Zhenjiang, 212013, China*

<sup>b</sup> *Key Laboratory for High Performance Transparent Protective Materials of Jiangsu  
Province, Jiangsu Tiemao Glass Co., Ltd., Nantong, 226600, China*

---

<sup>‡</sup> These authors contributed equally to this work.

<sup>\*</sup> Corresponding Authors. E-mail: maiyongzhu@ujs.edu.cn, nieyijing@ujs.edu.cn

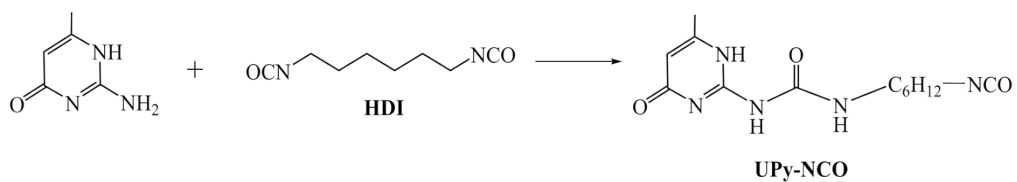

**Scheme S1.** The synthesis of UPy-NCO.

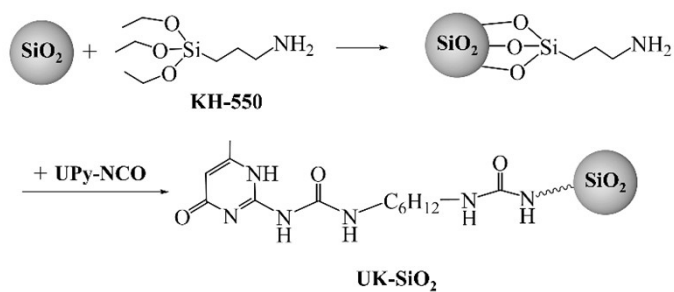

**Scheme S2.** The synthesis process of UK-SiO<sub>2</sub>.

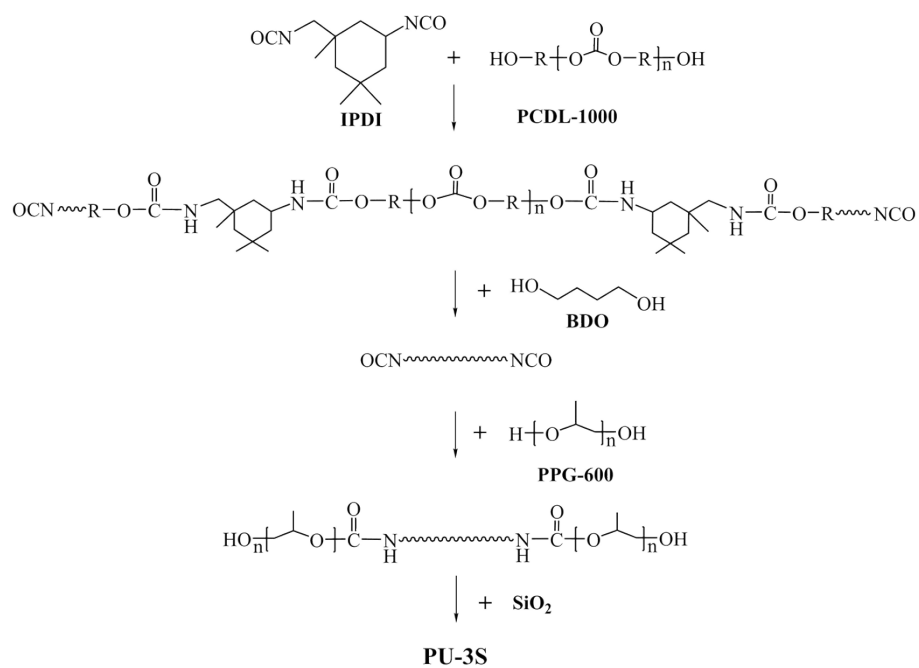

**Scheme S3.** The preparation process of PU-3S.

**Table S1.** Tensile strength of the PU nanocomposites filled with different contents of unmodified SiO<sub>2</sub>.

|                           | PU   | PU-1S | PU-3S | PU-5S |
|---------------------------|------|-------|-------|-------|
| Tensile strength<br>(MPa) | 2.13 | 2.20  | 5.89  | 3.11  |

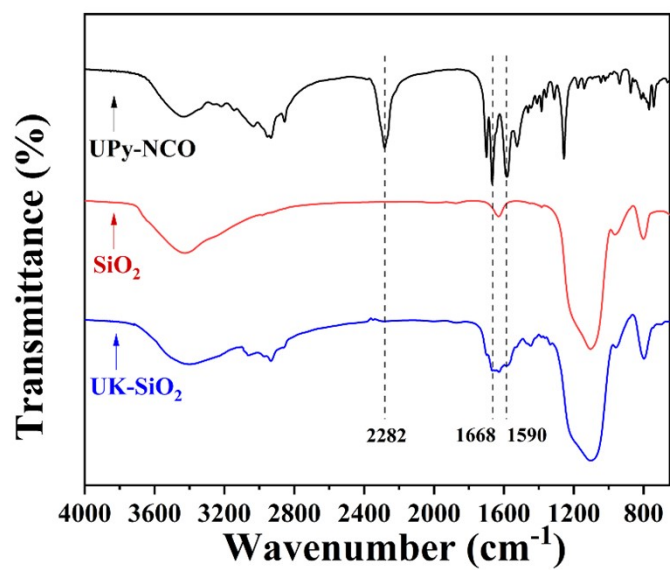

Fig. S1. FTIR spectra of UPy-NCO, unmodified nano-SiO<sub>2</sub> and UK-SiO<sub>2</sub>.

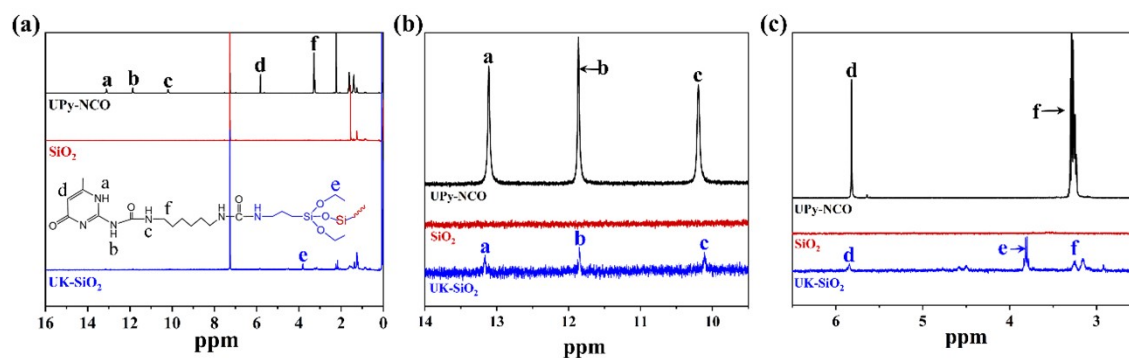

Fig. S2. (a) <sup>1</sup>H NMR spectra of UPy-NCO, unmodified nano-SiO<sub>2</sub> and UK-SiO<sub>2</sub>; (b, c) locally amplified <sup>1</sup>H NMR spectra of UPy-NCO, unmodified nano-SiO<sub>2</sub> and UK-SiO<sub>2</sub>.

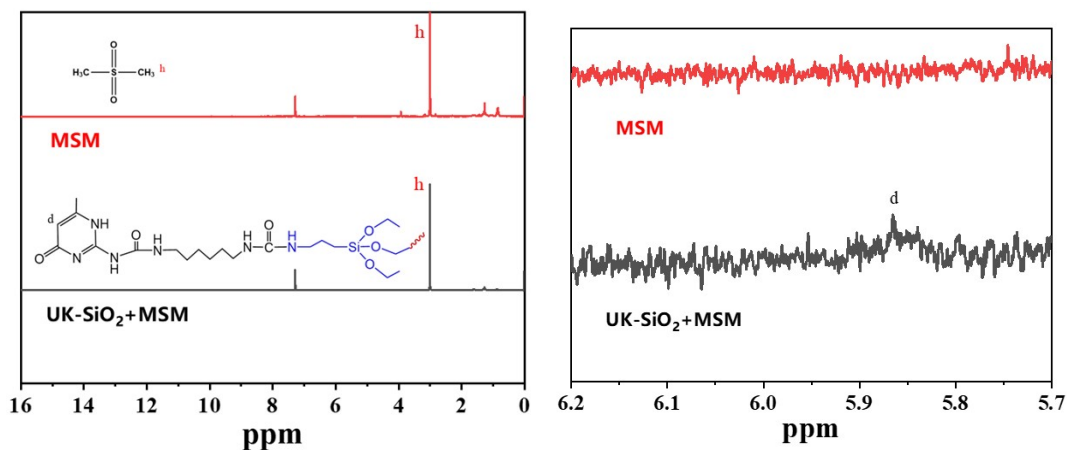

**Fig. S3.**  $^1\text{H}$  NMR spectra of UK-SiO<sub>2</sub> particles containing MSM as internal standard (the left panel); locally amplified  $^1\text{H}$  NMR spectra of UK-SiO<sub>2</sub> particles containing MSM as internal standard (the right panel).

**Table S2.** Particle size of nano-SiO<sub>2</sub> before and after modification.

|                    | Unmodified nano-SiO <sub>2</sub> | UK-SiO <sub>2</sub> |
|--------------------|----------------------------------|---------------------|
| Particle size (nm) | 114.1                            | 286.4               |

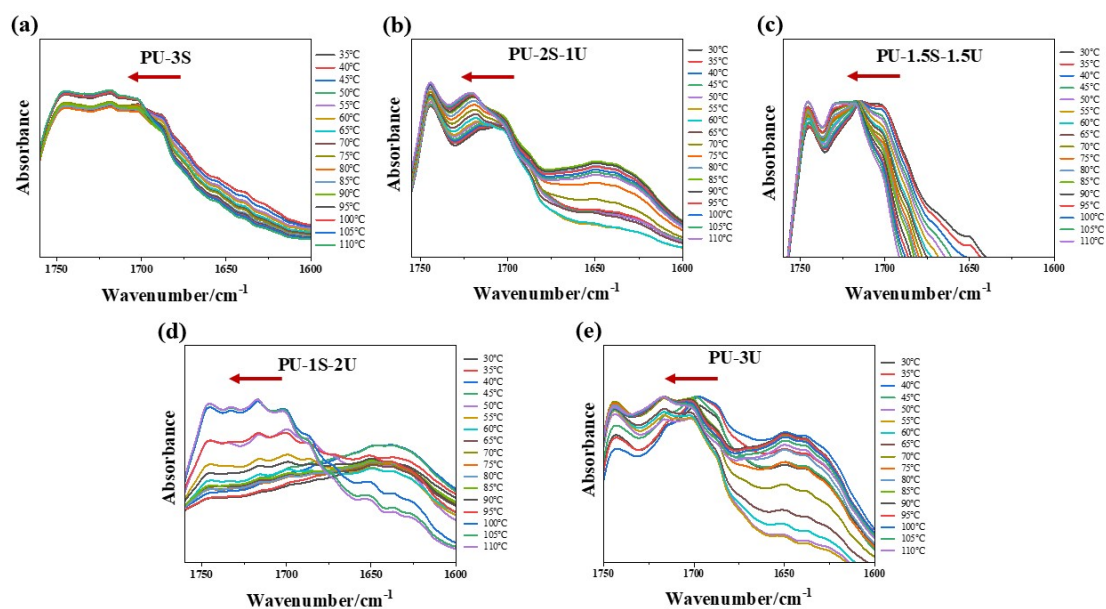

**Fig. S4.** FTIR spectra of the five filled PU samples, that is, (a) PU-3S, (b) PU-2S-1U, (c) PU-1.5S-1.5U, (d) PU-1S-2U and (e) PU-3U at different temperatures.

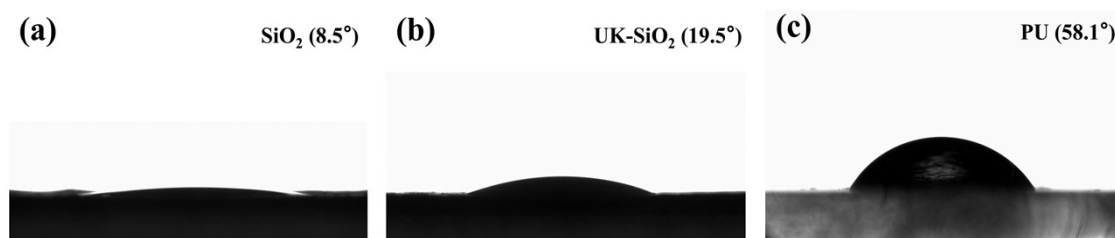

**Fig. S5.** (a) Photo of water contact angle of nano-SiO<sub>2</sub>; (b) photo of water contact angle of UK-SiO<sub>2</sub>; (c) photo of water contact angle of PU.

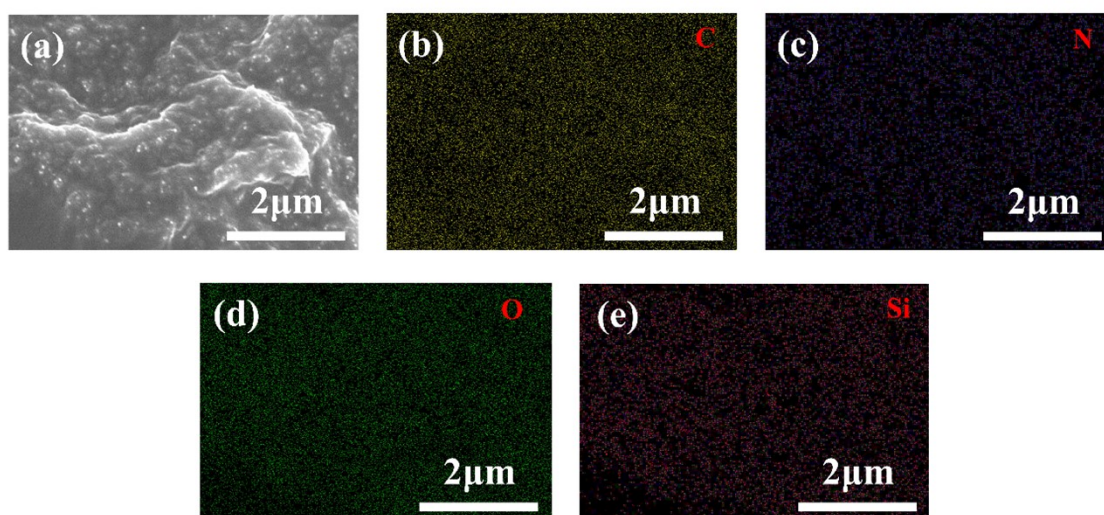

**Fig. S6.** (a) SEM image of PU-3S; distribution of (b) C element, (c) N element, (d) O element, (e) Si element in PU-3S. The content of C element in PU-3S is the highest, followed by that of O element, Si element and N element. The presence of Si element further indicates that nano-SiO<sub>2</sub> is successfully modified.

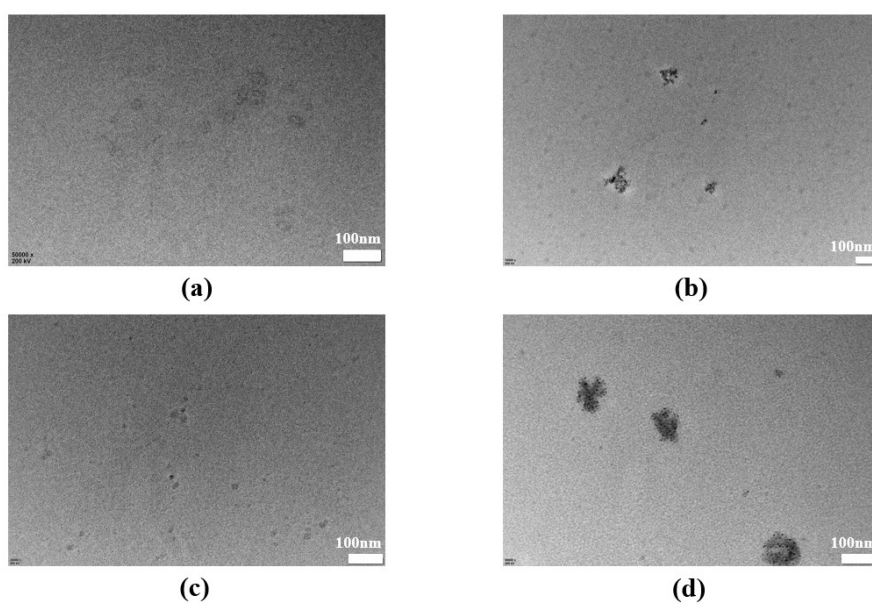

**Fig. S7.** TEM micrographs of (a) the PU-3S sample, (b) the PU-2S-1U sample, (c) the PU-1S-2U sample and (d) the PU-3U sample, respectively.

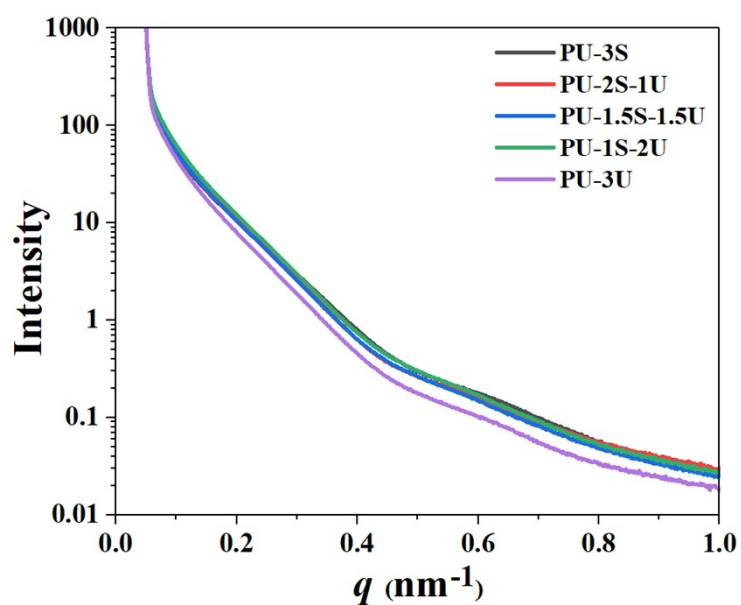

**Fig. S8.** SAXS curves of the five different PU samples (the PU-3S, the PU-1S-2U, the PU-1.5S-1.5U, the PU-2S-1U and the PU-3U samples).

**Table S3.** Tensile strengths of the five PU nanocomposites.

|                           | PU-3S | PU-2S-1U | PU-1.5S-1.5U | PU-1S-2U | PU-3U |
|---------------------------|-------|----------|--------------|----------|-------|
| Tensile strength<br>(MPa) | 5.89  | 18.94    | 6.8          | 5.24     | 13.09 |

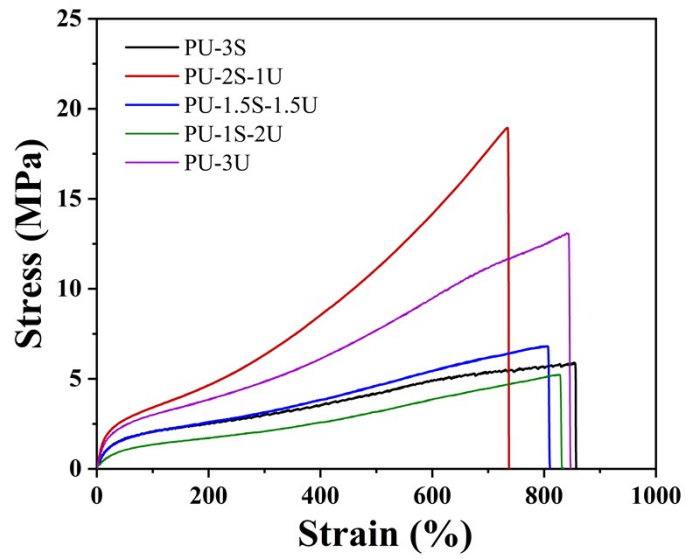

**Fig. S9.** Stress-strain curves of the different self-healing PU samples.



**Table S4.** The healing efficiency of the five PU nanocomposites under different self-healing conditions.

|              | 25°C-1h | 25°C-2h | 25°C-3h | 45°C-1h | 60°C-1h        |
|--------------|---------|---------|---------|---------|----------------|
| PU-3S        | 55.35%  | 63.84%  | 71.14%  | 87.60%  | 92.19%         |
| PU-2S-1U     | 24.39%  | 35.27%  | 58.13%  | 77.45%  | 93.98%         |
| PU-1.5S-1.5U | 54.41%  | 63.38%  | 73.68%  | 90.44%  | <b>107.94%</b> |
| PU-1S-2U     | 58.59%  | 63.93%  | 76.53%  | 91.60%  | <b>120.23%</b> |
| PU-3U        | 52.94%  | 61.88%  | 68.75%  | 85.10%  | 97.78%         |

**Table S5.** Healing efficiency of the five PU nanocomposite samples with different thickness healed at 25°C for 3 h.

|              | 0.5 mm | 1 mm   | 1.5 mm | 2 mm   |
|--------------|--------|--------|--------|--------|
| PU-3S        | 68.46% | 71.14% | 73.24% | 74.07% |
| PU-2S-1U     | 55.91% | 58.13% | 59.23% | 61.85% |
| PU-1.5S-1.5U | 70.17% | 73.68% | 74.83% | 75.39% |
| PU-1S-2U     | 74.04% | 76.53% | 77.61% | 78.43% |
| PU-3U        | 63.41% | 68.75% | 70.48% | 71.32% |

**Table S6.** Tensile strengths of the five PU nanocomposite samples with different thickness.

|                                  | PU-3S | PU-2S-1U | PU-1.5S-1.5U | PU-1S-2U | PU-3U |
|----------------------------------|-------|----------|--------------|----------|-------|
| Tensile strength<br>(MPa)-0.5 mm | 5.43  | 16.72    | 5.64         | 5.04     | 11.34 |
| Tensile strength<br>(MPa)-1 mm   | 5.89  | 18.94    | 6.80         | 5.24     | 13.09 |
| Tensile strength<br>(MPa)-1.5 mm | 6.76  | 19.56    | 7.32         | 5.69     | 14.3  |
| Tensile strength<br>(MPa)-2 mm   | 7.05  | 20.21    | 8.10         | 6.51     | 15.2  |

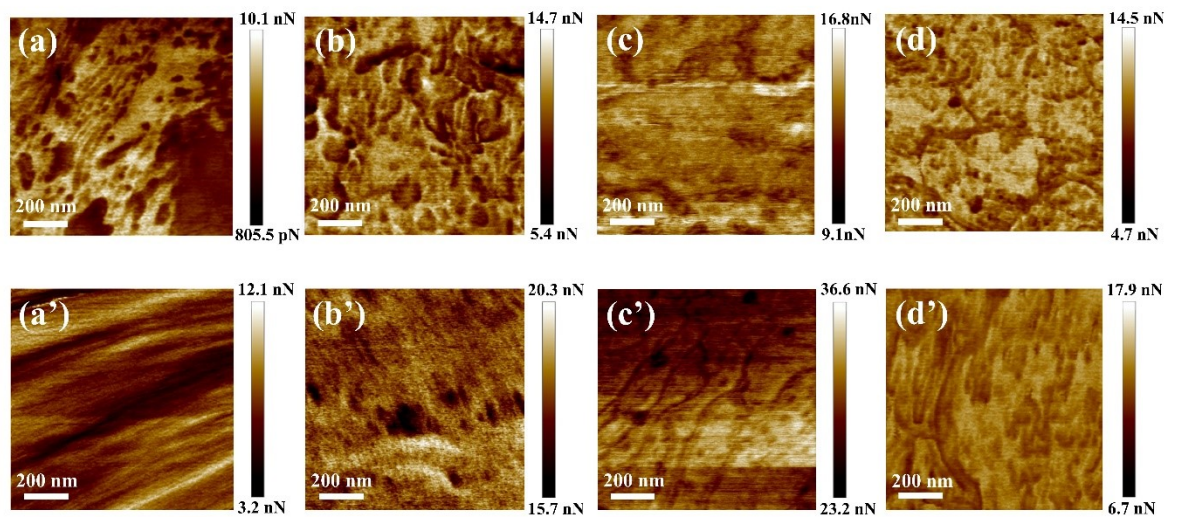

**Fig. S10.** (a~d) are the AFM adhesion distribution diagrams of PU-2S-1U, PU-3S, PU-1S-2U and PU-3U surfaces, respectively; (a'~d') are the AFM adhesion distribution diagrams of PU-2S-1U, PU-3S, PU-1S-2U and PU-3U cross-sections, respectively.
